# Supplementary material for: Mn-XRN1 Has an Inhibitory Effect on Ovarian Reproduction in Macrobrachium nipponense
Source: MDPI journal article supplement (doi:10.3390/genes14071454), 2023-07-16
Supplement: s1 [file s1]

> *Macrobrachium nipponense* *XRN1*

CACCAGGTCTGGGAATGGCACCCGTCCCGAACGCAATAGTAAATTGAATCAGTGC  
AACATCAACTGGACTTGTATGGCGAAGGAATTGTCATTACAGAACCAGTGAACC  
ACCAGGATACACAAAATGGGCGTCCCGAAGTTTACAGGTGGATCAGCGAGCGGT  
ATCCGTGTCTGAGCGAGGTCTGTCAGGAGTACCAGATCCCAGAATTTGACAACCT  
GTACCTGGACATGAACGGAATAATCCATGTGTGTTCCACCCAAACGACAATGACC  
CACATTTCCGAATATCAGAAGAGAGGATGTTTAAGGACATCTTCCATTATATTGAGG  
TACTGTTTCGTTTGATCCAACCAAGAAAGTGTTCTTCATGGCAGTGGATGGAGTT  
GCCCCACGAGCCAAGATGAACCAACAGCGTGGCCGAAGGTTCCGTTCTGCCAAG  
GAGGCTGTAGATGCTGAAAAGAGGGCCAGAGATCGGGGAGAAGTCTTACCTACA  
GAGGAGAGATTGCGACTCTAACTGCATCACGCCAGGGACGGAATTCATGGCTCGCC  
TAGATACCCACTTGCAGTACTTTGTAACCTACAAGATCTCTCAAGATAAAATGTGGC  
AAAATTGCAAAGTTATTTATTCTGGTCACGAGACACCAGGGGAAGGTGAACACAA  
GATAATGGAGTATATCCGATACACCAAGAGTCAGCCAGATTACAATCCAAACACTC  
GACATTGCCTCTATGGCTTGGATGCTGATCTGATCATGCTTGGGTTGACCTCCCACG  
AACCTCACTTCTCACTGCTTCGGGAAGAGGTACGGTTCGGCGGGAAGAAGGATAG  
CAACTCAAGAACACCGACGCCAGAGGAGACAACCTTCCATCTCCTCCATTTGAGT  
TTAATGAGGGAGTACATAAGCTATGAATTCAACGAACTCAAATCAACGTTGCCGTT  
TCCTTTTGACTTGGAGAATATAATTGACGACTGGGTGCTCATGGGTTTCCTTGTGGG  
TAATGACTTCATTCCACACCTGCCAACCTACACATCAATAAGGAAGCCCTTCCTAT  
ACTCTATCAGAATTACAAAAGTGTTCTGCCTACACTAGGGGGCTATTTGAACAGTG  
GCGGCAAGTTGAACTTGGAGAGGTTTGAAAAATTCATCGAGAAGTTGGCTCAAGT  
GGAAATTGATCAATTTCAAGGAGCTCAGTGCAGACCTCAAATATTTCAATGCCAAAA  
GGTCAAGAGATGGAAGTGCCTTTAAAGTGAACAAGGGAAAAGCTTCCGACATGG  
AATTAGTGCCATTTCGATTTGAGTGATGAGGAAGGCACCGATGATGAGGGGGAGATT  
GACCTTGAGAAAACCTTTTGAAAAGCTGGGCCTCGAGTCGCAGAGTGGACTCTTTG  
ACGATGGGGAGGACGACGATGACGGCTGGGAAGAGGACGAAGAGTTCCGCCAGC  
ATAAGAGAGAGTATTACATGACGAAAATGAACTACGAGAACGTGGATTCTGATGTG  
CTCAAAGAGCAGGCAACATGCTATGTGAGGGGGATCCAGTGGATTCTCAATTACTA  
CTACAACGGGATATGTTTCGTGGTCATGGTATTATCCATATCATTATGCCCTTACGTG  
TCCGACATCAGAGGCTTTTCCGACCTGAGGCTAGAGTACAATATGGGGAAGCCTTT  
TATGCCTTACGAACAACCTCCTAGCAGTGCTTCCCCCTCTAAGTAAGAAGCTTTTGC  
CAGAAGTGTACCAAGGCCTTATGACAAAGGAAGATTCTCCATTGAAGGAGTACTA  
CCCGGAAACGTTCCAGACCGACTTGAATGGAAAACAGCAGGAATGGGAGGCTGT  
TGTCTCATACCTTTTCATTGACGAGAAAAAACTCCTGGATGCCATGGCTCCGTGCA  
ACGAGAAGTTGGCCGAGGCTCAGAAGCAGCGTAATATTCATGGGCCCATGTATATT  
TATTCTTACACACCAGATAATCTTCGAGAGTACAAGGCGCCAAAAAATTTTCCTTC  
CGTTGGAGTGAATCATGCAGCGTTGGAGCTAGTTTATCGAGATAAGTGGGAAATAT  
TGCCAGACAAAATCTTGAAGGGGTTGTGCACAAAAGTCAAGCAAGACCTATATTT  
TGTTGGCTTTCCCACTGAAACACATACCCCATAGTTCCACATAGGAAAAGAAG  
CAGTGAAAGTGTTCCAGCAGAACAGCCGTGGTGAGAATTCATTTTGGACATCAC  
TGAACAGGACACCAAACCGGATTTAAAAGACCTTGCTAATCAATTGCTTGGTAAA  
ACCCTCTTTGTATCATGGCCTCATCTAGTCGAAGCCAAGGTCACAGCCTTAGCGTC

ATCCTCGGAGAAGTATTATCGGGTGAATGGGGAACTGCGCGTAGAGGTGCTGGAA  
GGATACAAGAAAGAGGAAACCAGCCTCTCGAGGAATAGCATTGCGACCCACTATC  
ACGACCGATGGGGAATCAATGTTGGGAACACTGAAATTCTGGTGTACGCAACAGC  
AATGACTGGGAGGAGGTATGTACCAACTCCAAACGGAAGAATTACTCTTGAGAAA  
TCCTGGTTCGAACATCATTACAGCCTTATGCCTACCAGACTGTAGTAAGAGATATCACA  
GTTACGACCCAGGATACAGAGAGCACATCAGCGTGGAGGAGTACTTTGCACCGC  
GAACCAAAGTGTTTATGCTGGGGCAACCTTGCTATGGTAGTTTGGGAGAGGTAATT  
GAGATCAACCCAGAACACAAAGGGAGGATCCGGGTTGTCATGACTGTCCTCAAAG  
AGCCAAGCTTTGATGTCGTGAGGAAGAAGCAGGAGGAACTCGACATGAGATATAT  
GCCGGGGTACATCGCAGGACAGAAGGTCGGTATCTCCACTCATTTATTGGCCCCGT  
TAACGGGCACAGTCTTCCTTCTTCCACCTTCGGCGGACAACCCAGGCGAGTTGGA  
CATGAAGAACAGGCTGAACATTGGGCTAAATTTGAAGAACAACAAAAAGAGCGA  
AGAGGTTCGTTCGGTTATACCCGAAAAGTGCTGGACGCTGGTGGGGCAAAGACCATT  
TGTTTATACTCTCCGAAGACTGTCCAACTATTGTTGAATACCAGTCAAAGTTTCC  
AGAAATCTTCGACCACTTGGCAGAGCAGAAGGGAGAAAAGGATATATTTTTCCAG  
GATGAAGTATTTGGCCAGGAACAACATAAGGAGCGCGTAGCAGAGTTGACAACAT  
GGCTGAAAGAATCAGACTTTGCCAAAGCAGCTCGTCAAAAGTGTTGGCACCCCTTG  
TCTGGATGAGGCTGTTGTAACGAGGATTATGGAGGAAGTTGACAAGGTTTCAGCA  
ATCATGGCCACGTCTATCAAAATGCAAGTTCGGCCTCACTTGCTGTTTAAGCCCAA  
TCCGCTCCAAGGAAGCACACCTCCTGATCTCACTGTCACGTATAACTTGTTCGACA  
GAGTGACCAACTGCAGGGAGGGATTTTCTGTTCCCCTTGGTGCCACGGGGACTGT  
AATCGGTATTCATCGAGCAGAGAAAGAGGCAGATGTCCTGTACGATATATTATTCGA  
TGAGGCGTTTGAAGAGGGCTTGACTTTTGCCGGACCAGCGACTGCTAAACATTGC  
TACAGGCTTCATTACGCCTCACTGATCAACTTATCACATGGAAGTCGACATAATTCC  
ACTGGCAGTACCAATGGAAATATGAGGCCTGAAGAGCCAAGACCCTCTGTGTGGA  
ATAATAATCGTCAGGACCAGAACTATCATTATAATCATCACACTCAATCGCAAGCAG  
TGAGACAAGGCTTTTCTCCTCACCTAGTCAGCAACACATGTCATATCAGTCTCCT  
CAGGGCAATTTCAACAGAGGGCAGGGCTATAGCAGTACGCCTCCAAAGAATAACC  
CGGGGTTTGATGTAGCGAGCCCTCAGCCTCCAGACCCCAATCAGTTACCAAGTCC  
ATCAGGCCTTTATGGAATGGCTGAGGTTTCGTTCTGCCAGGGAAGTCGAGTGTGTGCG  
TCTTTGGAACGTACTATACCCTGTGGAACAAAATTCACCAACAGGGTATTGGTAGA  
ATACCGGGCCATATTTATATTGTGTGCTTTTCGTACGTTTCTAAGATCAAACCGGGA  
CCAAAAGCATTCCAGCTGCTCATTTTCGTAGACATCAAGAAGGCCCTCGAAGATGG  
CATCAAGTTTTACAGAGTCAATGAACAGCAAATATCCTGCACTGGAGACAGGCAG  
GGTTTCATCCGTCCTAAGTACTTCAGTAAGGTTGTAGATTGTGAAAGTAATAGTATT  
ATATACACATCCCAGTATGGTTTTGGCACTGAAGCAATACCTGCGAACTTTGGAAG  
AGTGCCAGGTGGTGTGTATGGCCAAACACCACACATTGGCAAAGGTAGGGGAAG  
AGGCTTCGTAGGGCAACAGCCTCAGGCAATTCAGTTGTACGAAAATATTTGGTCAC  
AGATCCAACGGGAAGATAACGAGCACGGAAACGCACGGCCTGTTTCAGAGTCGAG  
GGCCGTCAAATGCAGCGCACTTCCCTGGAGCGAGGGAAGCTGGTAAATCAGACAA  
TGGCAGAACGGAGGTGTCAGTGGAGGACATATTCAGGGGAGCCAGAGCTTGTGCC  
ACTCAGGTTTCAGGACCAGTCATTAGCACAAACAGCTGAGTGCCGATCTTTTGTCAAT  
GCTGAAGCCGACTCAACAACAACCCGACAGACAAGTTGTGGAGAATGCCGCTCAT  
AAAGACGATTCCCCGACGAAGTCGGCGTTTGTGCCCACTCAGGTCATTTCGTAACA

GAACGCCGCGCAAGCCAAAGCCCAACATGTCCGAGGAGTCTGGGAGGCAAGTAC  
CTGCCGCCGAAGGGCAAAGTTTGACCTCAGCAGACATGGAGAGGCCTCAGGCAC  
AACAGACTCAGAGGCATATCCAGCATCCGAATGGGAACGGCAACAAACCGCGGA  
GAAAAGTGC GCAGCAGACTCGCCGTGAATTTTGGTCAGCCCTTCATGGAAGACAC  
ATAAAGTGTGAAGTTGTTACAAATGGTTTTATAAGTGTGATTATGTAATCGGTGTA  
AACTACTGACATGTAGAAAAAGATATTTTTGTGTGGATGACTTTATTTTAAATAACA  
GAAATACAACGAGATCCTTCATATTGAAGTCCATATTTTCATATAATTAGGAAACCCC  
CAAGGCCTCGGAGCAGAGAAATAGTTAATGTTTCTAGGAAAGTTTAAGCTTAGATT  
TTATTGTTAAATAATGTACAAGAGCATCAGTAAGCAGCAGTATGTAGGAGATGGCA  
AGTGTACACTGCCAAGTGTTTTAATTGGACTGGCTTTTACTCTTTCCCATATTTCA  
AGAATTTTGTGGCTTTCAAGTCAGTGCATTCTTGAAATGTGTAATTTTACCCATGA  
AGTGCAAAAGTGTCTTTTTTTCTGTTTTTTATTTTAACTTTGTGGTGCTGATGTTCTA  
GATTAATTTTCTTCTAATTAAAGTAATGTGTGTAGGAGGTGAGTTTCTATATTGTGA  
CCATGGTCATTATCGGATGCTTGTGACCAAGGTAAACAAGGCATTGATCTCAAGTA  
CCTTCTTGACGTTAGACGACAATCTACATTCTATATTCTTGACTGTCCCTAAGAACA  
AAGTCACAGATATGACATTATGCAAGATGCATTATATAACATTAGTTTGGATAGCTAT  
GGAAGTTTGTGTAGTTGGAATGTAGATACACATATCAAATGCTATCTGAAACATATG  
TTTACAAAAGTATGCAGCCAGGAGGAGGAAGAGACGTATGATTACCTTTCCAGAA  
CCTACTTCTCCAACCTCTATTTTATTGTTGATACTCATGACAGTTTCTCTACATTCTAG  
TGGGGAAGTTTTTCAAGTCTGAATTGGGAGTTATTTATTTTGGGAAATGTAAACATT  
TATAAGAAATATCTATGAATCAATCTTATATTTTTTAAATGTTGCATGGAGCTACAAA  
TGGCTTGACAGAGTATGCACGTTATAATTGTTTTTCAGCTACATTTGTTTCATTTTGT  
ACTTCCCAAGGACTGAGCTGCAAGGCTGAAATTTCCCATCGTTGTTTCAGAAATTCAT  
GATACTATATTTTCAAGTTTACAGTATTCTTTACTGTAAAAGTAAAGTACAGGGGAAA  
CATGCAATATCATAATTGTATTAAGAAAATGTTTTAACCCTAGCTACAATGAATAGAT  
ATACTGGTTTTTCATGAGATTTTTATAATTCTTATCACTTACTGCAGTAGCCATGTCAC  
TTATTTTATATTAATGTGTCATGTTGGTATTTCTTGCTGAAAGAAATATCTATAAACCC  
CACAGCACTGCCATTTTCACTTTAATAGATGTATTTAACTTGTGAAAATAAAATCCC  
CTGCATTGAACATTGTAATTGTAGTGTTTCATTGTTCTATATAACCAGAACTTGTACA  
ATCCCCCATGAGTGTCACAGCAGGTCTTGAGTGAAATATTTGAGATTTAAAGAAGG  
AACTATGCAATACTCTAGACTCATAGGTCTGGATAAACTAATCCTTATAATAATA  
GTATACTGATGGTTTCTAATCTCCCTTTTGGTGTGAGAATTGTTGTTCTTTCTTCTTA  
GTGAAACTAGTCCATTCTTGTAACCTCTAATGCCTTTTTGTTTTTACAGCAGATCT  
CTACAGTAATCTCAGCAGATTGAGATATAAAATGTGGACCCCAACAAAAATGTAA  
AATTCAGTCTTTTGAAATGCTTTGGACGCTCCTTTGAATTTATCCACCTTTAGTTCTT  
TCATATATGGTAGGATTTTTTCATGAATTACGTTAAGTTTGTGTAAATTTGGAATCAT  
TTTAATTTTCGTCCTTCTCAGTTAGGGCTCTTAAAAGATAACTCATATAAACATGTAC  
CTGTACTGAATCAGATTTACCTGTTTGTGTAGGTGATTTTTCAGTATTTAATGTTTT  
GTTTTGCAATCATATGTTTCATCTTGGTAATTGAGAATGAGTTAGAATTTTGTACTTGT  
TTTGGTCATTTTCATGGTTAGCAAATAACCCTACATAAAGCAATGTTTTTCTGTGAG  
TGAATGTTACAGTTGAATGTGCTATTTTAAATAGTATGGCCAATTTGGGATAATAAAT  
GTTTCAGCACAAAAAGAATTATGAGAGAGAGAGAGAGAGAGAAAATGCAAAGGGTAG  
AAATAAATAGAACATAGTACGTAGCAAGAGAAGAAGATGAATGGAAGTACTGATG  
AGGAAATTATCAAACAAAAGATTGACATTGATTGATGCATCAAGATTACAGCGCCA

CCTATTACCAACTTCTGATTTTTGAACAACCATCCCTTTTTGGTTCAAATAATTTCTT  
CTTCTGTGGAGAGGGGCTGGGTGATCAATACATTCCAGAACTTTTTCTAGTTAGT  
CGCATTTCTTGGGAATGTCATTCGTGTTATTGGACTAACAAACAATTACGATAACTTG  
TCACGTACCAGCAGCCAATTCAACAACATTATCTACATGGATGGGTGACATACATTA  
CCAACAAATGTAAAAATAATTCTGGAATATAGAATTACAGAAACATATACAGTATAT  
GTATATGAGTAAATAGTAAGTACATAGTAAATAGTACATATGACTACACTTGATACTT  
TCAGTACTTAATCATTTCATAAATATAGACATGTAGATGTTTCCTGGCCTACGTTGACT  
CGTTTTATATTTTACAGTTTTACAGTGGTAGAACTGTATTCTGAACCTTTGAATTTTCAT  
TTTGTCTCAAATATGTAATTGGATGTTTGCCAGTCTGGGAAATATTTTGGGGAAAC  
CTGGGTGGTTGCTCTGTCCCCAGCCATTTGGAGAACTTAATAGTTCACAGGTAATG  
AGAAATGGTGCCTTGCGGTACCCTGCTATCTTCCAGAGATGTCTTCAAGAAGTTCT  
GAGACCATTCTCCTTTGGACCTGTGGTGACTGCTCTCTATAGGTTATGTAGTTTCCA  
AGTTCCTCTCGGACATAAGTGACTCGGATGACCCAAGGCTAGAGACTGAATGGAT  
GAGTGACTGGCTCTCTTTCTGTTGCTCTTCTTCCTTCCTTTGCAAGAGTGTAATCAG  
GATCACTACATGCTGGGCAGGCCAAGTTGCAGATATACTTCACAATTGAGCATCTT  
AACTTAGAGCTCTGGTTCACAAAGGGTGACTCCCTCCACTCTCCCTAAAGCTATTT  
TCTTAAGCCATCAATTTATGATTGACCCAGATACTTGCTGTCCGCTGATCTGGGCTA  
CTGTGTTGTCAGGGCAACTCTGGTTCTCAGAAGTTTTCCAAGCGTGAGAGTTCAG  
ATGCATCTCACTCTGGCTTAGACCTAATCAATTTTGCATCCCTATGCCAGATTGTATG  
GACAATTGCTGGAATTATTGCTCGTGAGCACACAATCGTGACCAGGGACAGCAATT  
CTGAGTGGAATTC AACCTACCAGTCAGTTGAGAGATGCTCTTTCCACCTAAGAAT  
GAGTCTTTTACGAGAAAGGCTGTGGTTTATAGCCCTAGCATTTGATCGTAATCCCAT  
TTCAACTACCCAGCATAGTCCCTGATGCCGAACAAAATATGCGTGGTGACGGCAAG  
TGAGTGGAACCTCTTCCCCCTTCCAATCACTGCCCCGCTTATCACTTGGACCACC  
AAGTGAGCTACCTTGTTACCAAGATTCCATGACCTATTCCAGCTTGTACTACTAAAA  
GCTACTCCTATATGTAAGGCTCTTGTTTGTATACTAGGAAAAGTATAACTTGTTATAA  
AAATGAAATTTTTTCACTTTTCAACTTGAAACATGAATTTACCATGTTGAAGTATCC  
ACTCAGCCAATTTTTTAATGTGTTTTTGGTAGCTGGAACAGTTGAAATGAAAAGAA  
TGAGTTTGAAATTGTCCTTAGCATTTTCATATGTTTTTTGGACACAAACAAACATAC  
ATTGTTAACATGTGACTTTCCTCTAAGGAGTGATCAGTAAAAGGTGAATTACAATG  
TGAAGTTGACTCCAAGTTGAAATATCACTGCTGGATGTTAACTTGGGACAAAGA  
CTTGCCGTAAAAAACCTTGGTTATCTTTGTGTATCTTTTATAGCTATAGTTTAAGCAA  
TGAGACCTATGAGAAATCATTAGGACTTCTTAATGTACAAGATAATTTACACCGGTC  
AGGTTTTGTTCTTGAGGGAGTTGTCCACGTTTATTTGTTTTGTATTACAGAAAACCTT  
TCTACCAGTTTCATAAAGCAATGAAATGTAAACTAGTAGCTCTTGGCTACAACCTT  
GCTTTCCATATTTTGCTCATCTGACTTTCTGGTTCCAGTAATGTTTTGCCAGCTGCG  
CGCAAGAAAGTGTCTTGCTTCTGTATTCATAGCTCTCAGTTTTCTGTATCATTTTCA  
GCAATTTCAAGGCATTTCAAATTACTTGTTGCGATGTATATCCCAGAGATATGTGCT  
TATTCTTTTAATTTATTTAAAGTAAAATGTAAATGAATTCGCTGCTGGTTTCATACAA  
CAGAAATACATACTCCTTGTTGATGGTGTGTGTGTGTGTTGTGTAATTAGAGTCCA  
ATTTGTTTCTACGTGTGCATTGATGGTGTACCTGTCGATTTGTTTTTGGAAACCCCTT  
ACAACCTCGAGTTTATATCCCTTAGGTGGTAGTACTATTAATTCCTTTTCATTCTTTC  
ATTGTACTCCTGTTTCATATTGTCTTTCTTCTGTCTTCCTTTCCACCCCTTCCTAACAA  
TTGTTTCATATTGTAACCTGTGAGGTTTTCTCCTGTTACACTTTTGAAACCCCTCTTTT

CTCTCAATTACCCATTCATCTCTGAATGACTTCATGGGTTCCAGCGCTTGGCCATTG  
GCCTAAATTCTATATGTATTCCTTCCGTCAAGGTTATAGGTTATTTTATTACTAAT  
TGTATTGATCTGATATTGGCATTTAATATGATGCAAGCACACTAACGCATCCAGTCA  
CATGATTCTAGGCTTGCTTTATTTTCACCTTCCGATGACCATGTCACTGAGTGATGT  
CTTATAAAATAGTCCTAAATGAATGAATTTTTCTATCCTGTGTGTCGATCGTGCAGAGT  
TTCTCAGTTTGTATTATATATTTTAAACCACTTGCAATATTCATAAAATACTGTAGCAG  
AAACATCGTTGGTGGTTCATAATTCATTTTGAATGAATGTTTATTATCACACTTCTGC  
TTGCAAAGGTTATGCAACATTATCTAAACAGTAAAGACAGCAATGTATTGGTTTTTC  
TGTGAAATAATTATTGCTGTAAAACCTTTTAAAGGAATCATCTTATCATCTATATGAAT  
TTTGCTGGTTTTCGTATGCTATTTTATTCAAGCAAAAGACAACATTCTAGAAGTAAGG  
CTGTGGAGAGAATTCTGTGAGTTAGATTTTCATGTGGATGTTGTTGGTTATCTCTCTT  
TCTGAGAAAGAAGCCAAAGACCGTACTGTAATGCATATATAAACTCAACTTGGTTT  
AAGAAATGAAGGTATGTATTTGCAACTTTAAGTAGCGACACCACCCTACTTACAAA  
TGAGTTACGTCCCAGATGGCTGTTTGTGTTGAATTTTTTTTGTACAGGTAGCCCTTG  
GTTAACAGTGGGGCTTCCGCTGCTGTAACTAGAAATTTTGCGCTGTAAACCGGAT  
ATCGGCGCTGCTAACCCAGAGATTAGCCCCAAAAATCCAGTTAACAGCGTCATTAGA  
CAAGTGCTGTAAAACCGGATAGCCATTTAATGATACCGCCGTTAACCGAGAGCTGC  
CTGTAGTTGGTTACTGTACTCTTCATGCCGATTTAAATACAGTATGATGTAAAATCA  
GTACAGTTCTGTACGTTTTATCATCTTAGAACACAATCCACTGTACATACACTACTG  
TATGTTTACAGTATGTATGGAGAGAATAGGCAAGCATAACAAAATTTGAAATTACG  
GGTGGCAAAGGGGAGTGTTTCGAAGACCACTCTAATTTACGATCACATTTGGTTGTG  
TCTGAATGTTTGTAAGTATAGAATGTTCTTAAGTAGGGTGGTGTCTGTACTGTATTG  
AGATATTTTATGGCTCATAGTTTCGAGGAGTTTTTGCAAGTATTTTCTAATACTGTGTA  
TTTCCGTTCTTTTAGGGTGTATAGTATGTTGCATGTGATTGTTATCATTATATTACTTT  
ATTATTATTACTGTCATTATCATTGCTAAAAAAGTTACTGTGTCTGTGACAGAACTGTT  
CTTTGTTGAAAATCATCAGTCATTGCAATATCTTGGCTTGTAAGCTTTGACTGGAAT  
ACAAGATACAATATGGGAACCAACTTTGGATTTTAGTGGCACCATCACAAACAAGA  
GTACGTATTGTCTTACAATGCCAAGGGTCTCAGTAGTATATGGAAGATAAAAAATTAA  
GAATATACTATAAAAGAAAAATGAAAGATAGTAAGATGGCTGACTGTGAAATAAGA  
CAGATGACATTATTCCAAACAAAAATAAACATTTGCACCAAGTTTTGAATTTCTGA  
AGCCCCAAATTGTTGTGAAGCATAGACTCGTTTTTCCAGAATCTGTGCCTGCTGAC  
TGCTGTGTTTCATTAGTTTAGGTGTTTTTCCAGCCTAGTCATATTGAGAGTATGTTAGC  
TTCTCTGCCGAGCGAGGCACCATTTTTGTAGAGATAATTAACCTCTTGTTCTTTCTG  
AATTAGTATATATGATTTTGCAATTTTTTTTACTAATATATCAATGGCTGATCTGGGTG  
TCACAGTTGTGCGAGAAGTGAATATGAAATTGTGGTTACCAGTGGGATTCCTGTCTT  
CTTCCGTAGCCTATATTGTAGATTATAATCATACTAGCTTTTTATATGTGGTACTGT  
ACTCATAACGAATGAAATGATTCACACTGGTTTGAAAAGAAAATGCACTTGTTTGA  
AAGAGCACTTCAGGGTTGAGTTTTGTGACAATGATATTGGCACAAGAACATTTAG  
AGTGAATGTATCACATTGCACCGACAAGTGAGACTCGGATAAAAGTTTATTGCAGT  
ACAGTTTATTGTACGGTATGATTATAATTACTGTGTAATATTCAGTGAATAGGATTAG  
GTTGTTTGTAAACAACTCCCGATTATGACACGTAAAAAATGAAGGACTCTTGTA  
AAAAA
